# Supplementary material for: Formulation of Folate-Modified Raltitrexed-Loaded Nanoparticles for Colorectal Cancer Theranostics
Source: PubMed Central journal article supplement (PMC7076500; doi:10.3390/pharmaceutics12020133), 2020-02-05
Supplement: pharmaceutics-12-00133-s001.pdf [file pharmaceutics-12-00133-s001.pdf]

## Supplementary Materials: Formulation of Folate-Modified Raltitrexed-Loaded Nanoparticles for Colorectal Cancer Theranostics

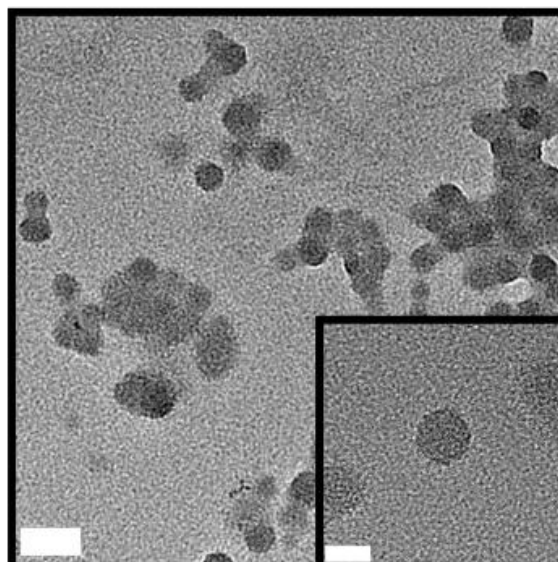

**Figure S1.** Transmission electron microscopy images of formed RTX NPs. Scale bar in lower magnification (larger image)—50 nm, scale bar in higher magnification image (inset)—20 nm.
